# Supplementary material
Source: publisher site journal article supplement (https://www.dovepress.com/article/300394)

# Supplementary

**Table 1.** Surgical procedure codes for hysterectomy

| **Procedure** | **1977-1995 (ICD-8)** | **1996-2015 (ICD-10)** |
| --- | --- | --- |
| Laparoscopic hysterectomy | opr61050 | KLCD01, KLCD04, KLCD11, KLCD97 |
| Robot-assisted hysterectomy | No code exists | KZXX00 |
| Abdominal hysterectomy | opr61020, opr72230 | KLCD00, KLCD96, KMCA33 |
| Vaginal hysterectomy | opr61040, opr72650 | KLCD10, KLEF13 |
| Supravaginal hysterectomy | opr61000, opr72110 | KLCC10, KLCC11, KLCC20 |
| Radical hysterectomy | opr61100, opr72240 | KLCD30, KLCD31, KLCD40 |

**Table 2.** Categorization of indication; benign vs. malignant

| **Indication** | 1995-2015 (ICD-10) | |
| --- | --- | --- |
| Malignant | DC*  DD0*  DN87*  DD391A | Cancer  Carcinoma in situ and atypical endometrial hyperplasia  Cervical dysplasia  Borderline ovarian tumor |
| Benign | All others | |

* Including all sublevels

## Additional analyses

**Table 3.** Uncorrected and hysterectomy-corrected incidence rates of hysterectomy per 100,000 person-year overall, stratified by calendar year and age group.

|  | **Uncorrected** | **Corrected** | |  |
| --- | --- | --- | --- | --- |
| **IR (95%CI)** | **IR (95%CI)** | **SIR (95%CI)** | **AAPC (95%CI)** |
|  | | | | |
| **Total** | 302.7 (300.8;304.6) | 343.8 (341.6;345.9) | 351.1 (348.9;353.3) | -1.4 (-1.9; -1.0) |
|  | | | | |
| **Calendar time** | | | | **APC** |
| **2000** | 301.1 (293.7;308.6) | 342.5 (334.1;351.0) | 362.9 (354.0;372.0) | - |
| **2001** | 322.8 (315.1;330.6) | 367.0 (358.4;376.0) | 388.8 (379.5;398.2) | 7,1 |
| **2002** | 338.9 (331.0;347.0) | 385.3 (376.4;394.5) | 406.3 (396.9;416.0) | 4,5 |
| **2003** | 330.2 (322.4;338.2) | 375.5 (366.6;384.6) | 393.8 (384.4;403.2) | -3,1 |
| **2004** | 305.8 (298.3;313.5) | 347.8 (339.3;356.5) | 360.9 (352.0;370.0) | -8,3 |
| **2005** | 307.6 (300.0;315.3) | 349.8 (341.2;358.6) | 359.9 (351.0;368.9) | -0,3 |
| **2006** | 303.8 (296.3;311.5) | 345.5 (337.0;354.3) | 352.2 (343.4;361.0) | -2,1 |
| **2007** | 307.0 (299.4;314.7) | 349.0 (340.4;357.8) | 353.0 (344.2;361.8) | 0,2 |
| **2008** | 289.5 (282.2;297.0) | 329.0 (320.7;337.6) | 331.4 (323.0;340.0) | -6,1 |
| **2009** | 311.6 (304.0;319.4) | 354.0 (345.4;362.9) | 355.9 (347.2;364.8) | 7,4 |
| **2010** | 290.2 (282.8;297.7) | 329.4 (321.1;338.0) | 330.9 (322.5;339.5) | -7,0 |
| **2011** | 302.4 (294.9;310.0) | 343.1 (334.6;351.8) | 344.2 (335.6;352.9) | 4,0 |
| **2012** | 286.5 (279.2;294.0) | 325.0 (316.7;333.4) | 325.1 (316.8;333.6) | -5,5 |
| **2013** | 285.2 (277.9;292.6) | 323.2 (315.0;331.7) | 323.2 (315.0;331.6) | -0,6 |
| **2014** | 288.7 (281.4;296.2) | 327.1 (318.8;335.6) | 327.0 (318.7;335.4) | 1,2 |
| **2015** | 270.6 (263.6;277.9) | 306.3 (298.4;314.5) | 307.1 (299.1;315.3) | -6,1 |
|  | | | | |
| **Age group** | | | | **AAPC (95%CI)** |
| **20-39** | 107.2 (105.3;109.2) | 107.8 (105.9;109.8) | NA | -1.8 (-2.6; -1.0) |
| **40-54** | 611.6 (606.5;616.9) | 674.0 (668.3;679.7) | NA | -2.0 (-2.5; -1.5) |
| **55+** | 256.4 (253.6;259.1) | 332.9 (329.3;336.4) | NA | -0.4 (-0.9; 0.2) |
| AAPC: average annual percentage change  APC: annual percentage change  IR: incidence rate  SIR: age-standardized incidence rate, US 2010 female population  NA: not applicable | | | | |

## Sensitivity analysis

**Figure S1.** Sensitivity analysis with the premalignant diagnosis codes categorized as benign disease instead of malignant disease. Age-standardized (US 2010 female population) hysterectomy-corrected incidence rates of hysterectomy over calendar time.


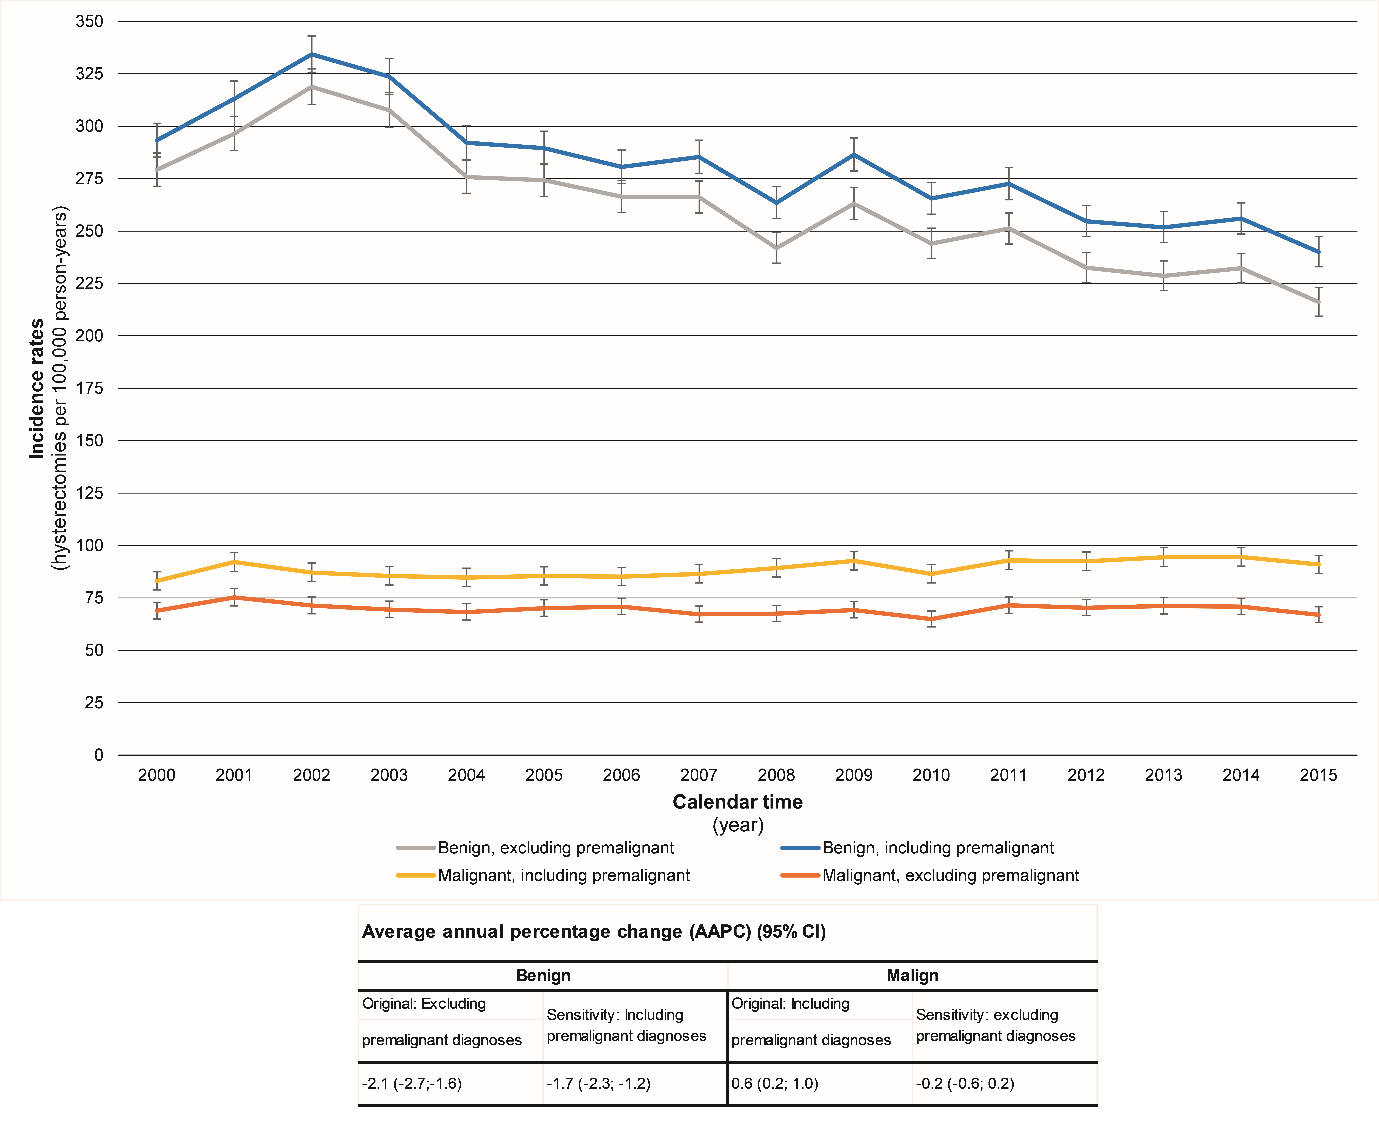

Supplement: Supplementary file 1 [file get_supplementary_file.php]
